# Supplementary material for: Relationship between perceptual and mechanical markers of fatigue during bench press and bench pull exercises: impact of inter-set rest period length
Source: PeerJ. 2024 Jan 17;12:e16754. doi: 10.7717/peerj.16754 (PMC10799610; doi:10.7717/peerj.16754)
Supplement: Supplemental Information 1 [file peerj-12-16754-s001.xlsx]

## Sheet: Press_ANOVA
Set1_R1_MVT45	Set2_R1_MVT45	Set3_R1_MVT45	Set4_R1_MVT45	Set1_R3_MVT45	Set2_R3_MVT45	Set3_R3_MVT45	Set4_R3_MVT45	Set1_R5_MVT45	Set2_R5_MVT45	Set3_R5_MVT45	Set4_R5_MVT45	Set1_R1_MVT35	Set2_R1_MVT35	Set3_R1_MVT35	Set4_R1_MVT35	Set1_R3_MVT35	Set2_R3_MVT35	Set3_R3_MVT35	Set4_R3_MVT35	Set1_R5_MVT35	Set2_R5_MVT35	Set3_R5_MVT35	Set4_R5_MVT35
6	7	8	7	5	5	5	6	5	6	5	6	5	7	6	7	7	7	8	8	4	6	6	7
5	4	4	3	7	7.5	7.5	7.5	6	7	7	8	7	7	8	8	7	7.5	7	8	7	7.5	7	6.5
5	5	5	6	5	5	5	5	7	5.5	6	6	5	6	5.5	6	6.5	7	5.5	7	7	7	7	6.5
7.5	6	7	7	7.5	8	8.5	8	7	6.5	6.5	6.5	8	8.5	8.5	9	7	6.5	6.5	7	7	7	7	7
7	6.5	6.5	6.5	6.5	7	6.5	6.5	5	7.5	7.5	7.5	6.5	7	5	6.5	6	5	5.5	6	6.5	7	6.5	6.5
7	7	7	7	7	7	5	5	6	6	7	6	7.5	7	7	8	7	7	7	7	7	7.5	7.5	6
5	5.5	4	2	1	2	1	1	2	2	2	2	8	8	10	8	7	6	6	3	5	6.5	4	5
7.5	7.5	8	8	7	7	7.5	8	6	6	7	6.5	7.5	8	8	7.5	7.5	8	8	8	7	7.5	7.5	7.5
4	5	5	5	5	5.5	5.5	6	5	5.5	5.5	6	6	6.5	7	7	5.5	5	6	5	5	6	6	6.5
6	6	6	6.5	6	6	6.5	6.5	6	6.5	6.5	7	5.5	6	6.5	6.5	5	6	6.5	7	5	6	6.5	6
7	7	7	7	8.5	8	8	8	7.5	7.5	7.5	7.5	8	7	8.5	7.5	8.5	8.5	8.5	8.5	8.5	8.5	8.5	8
7	7	7.5	8.5	8.5	7.5	7.5	7.5	8	8	7.5	8.5	8	8.5	8	8.5	8	7.5	7	7	8	7.5	8	7
7	6	6	6	7	7	6	6.5	7	7.5	7	6.5	6.5	7.5	8.5	7	8	7	6.5	6.5	7	5.5	5	7.5
6.5	7.5	7.5	7	6	6.5	6.5	6	7	5	6.5	6.5	6	6.5	6.5	6.5	6	7	7.5	7	6	6.5	6.5	6
8	7.5	8	8	6.5	7.5	7	7.5	7.5	7.5	8	8.5	8	8	7.5	8	8.5	9	8.5	9	8	7.5	7.5	8
6	6	6	7	5	6	6	7	5	5	6	5	6	6	7	7	6	8	8	8	5	6	7	8
5	6	4	3	5	6	1	4	3	4	6	4	3.5	3	2	2.5	6	5	6	5	3	5	7	5
5	5.5	5	5.5	3	4	4	3	4	2	1	1.5	7	7	7	7	6	8	5	6	5	6	6	6
7.5	8	7.5	7.5	8	7.5	8	8.5	9	7.5	6.5	6	9	9	9	9.5	7.5	8	8.5	8.5	7	7.5	7	7
7	7	7	8	3	4	5	4	2	4	2	4	3.63526	4.05097	4.04477	3.77293	4	5	4	4	3	4	5	4
7	7.5	7	8	5	5	5.5	6.5	7	7.5	7.5	7.5	8	6.5	6.5	7.5	8	8	8.5	8.5	7	8	8.5	8.5
6	6	6	6	5	5	5	5	2	2	2	2	5	5	6	6	5	6	5	5.5	8	8	8	7.5
4	5	4	5	4	3	4	4	4	6	6	6.5	6	7	6	6	5	6	5	6	7	7	7	7

## Sheet: Press_Figure 2
	Other	RPE
Rep_Set1_R1_MVT35	6.2	6.83333
Rep_Set2_R1_MVT35	4.06667	7.23333
Rep_Set3_R1_MVT35	3.2	7.36667
Rep_Set4_R1_MVT35	3.33333	7.4
Rep_Set1_R3_MVT35	6.13333	6.96667
Rep_Set2_R3_MVT35	5.06667	6.93333
Rep_Set3_R3_MVT35	4.73333	6.93333
Rep_Set4_R3_MVT35	4.6	6.93333
Rep_Set1_R5_MVT35	6	6.53333
Rep_Set2_R5_MVT35	5.86667	6.9
Rep_Set3_R5_MVT35	5.46667	6.7
Rep_Set4_R5_MVT35	5.2	6.73333
Rep_Set1_R1_MVT45	4.06667	6.36667
Rep_Set2_R1_MVT45	3.06667	6.3
Rep_Set3_R1_MVT45	2.73333	6.43333
Rep_Set4_R1_MVT45	2.6	6.3
Rep_Set1_R3_MVT45	3.26667	6.23333
Rep_Set2_R3_MVT45	3.4	6.43333
Rep_Set3_R3_MVT45	3	6.2
Rep_Set4_R3_MVT45	3.46667	6.33333
Rep_Set1_R5_MVT45	4.13333	6.13333
Rep_Set2_R5_MVT45	4.06667	6.26667
Rep_Set3_R5_MVT45	4.53333	6.43333
Rep_Set4_R5_MVT45	3.86667	6.6
MVfast_Set1_R1_MVT35	0.518	6.83333
MVfast_Set2_R1_MVT35	0.456	7.23333
MVfast_Set3_R1_MVT35	0.432	7.36667
MVfast_Set4_R1_MVT35	0.434	7.4
MVfast_Set1_R3_MVT35	0.521333	6.96667
MVfast_Set2_R3_MVT35	0.496	6.93333
MVfast_Set3_R3_MVT35	0.481333	6.93333
MVfast_Set4_R3_MVT35	0.484667	6.93333
MVfast_Set1_R5_MVT35	0.527333	6.53333
MVfast_Set2_R5_MVT35	0.508667	6.9
MVfast_Set3_R5_MVT35	0.498	6.7
MVfast_Set4_R5_MVT35	0.5	6.73333
MVfast_Set1_R1_MVT45	0.544	6.36667
MVfast_Set2_R1_MVT45	0.5	6.3
MVfast_Set3_R1_MVT45	0.494	6.43333
MVfast_Set4_R1_MVT45	0.482	6.3
MVfast_Set1_R3_MVT45	0.5	6.23333
MVfast_Set2_R3_MVT45	0.509333	6.43333
MVfast_Set3_R3_MVT45	0.498667	6.2
MVfast_Set4_R3_MVT45	0.516	6.33333
MVfast_Set1_R5_MVT45	0.52	6.13333
MVfast_Set2_R5_MVT45	0.522	6.26667
MVfast_Set3_R5_MVT45	0.536667	6.43333
MVfast_Set4_R5_MVT45	0.506	6.6
MVDset_Set1_R1_MVT35	39.3728	6.83333
MVDset_Set2_R1_MVT35	30.9185	7.23333
MVDset_Set3_R1_MVT35	24.9132	7.36667
MVDset_Set4_R1_MVT35	37.2514	7.4
MVDset_Set1_R3_MVT35	42.6464	6.96667
MVDset_Set2_R3_MVT35	36.7677	6.93333
MVDset_Set3_R3_MVT35	33.9503	6.93333
MVDset_Set4_R3_MVT35	36.3577	6.93333
MVDset_Set1_R5_MVT35	40.816	6.53333
MVDset_Set2_R5_MVT35	41.3159	6.9
MVDset_Set3_R5_MVT35	40.5462	6.7
MVDset_Set4_R5_MVT35	38.9924	6.73333
MVDset_Set1_R1_MVT45	23.1795	6.36667
MVDset_Set2_R1_MVT45	16.3695	6.3
MVDset_Set3_R1_MVT45	19.3415	6.43333
MVDset_Set4_R1_MVT45	15.3966	6.3
MVDset_Set1_R3_MVT45	15.8362	6.23333
MVDset_Set2_R3_MVT45	17.8665	6.43333
MVDset_Set3_R3_MVT45	17.0297	6.2
MVDset_Set4_R3_MVT45	20.2083	6.33333
MVDset_Set1_R5_MVT45	21.9419	6.13333
MVDset_Set2_R5_MVT45	20.6022	6.26667
MVDset_Set3_R5_MVT45	24.5428	6.43333
MVDset_Set4_R5_MVT45	18.8601	6.6

## Sheet: Pull_ANOVA
RPE_Set1_R1_MVT65	RPE_Set2_R1_MVT65	RPE_Set3_R1_MVT65	RPE_Set4_R1_MVT65	RPE_Set1_R3_MVT65	RPE_Set2_R3_MVT65	RPE_Set3_R3_MVT65	RPE_Set4_R3_MVT65	RPE_Set1_R5_MVT65	RPE_Set2_R5_MVT65	RPE_Set3_R5_MVT65	RPE_Set4_R5_MVT65	RPE_Set1_R1_MVT55	RPE_Set2_R1_MVT55	RPE_Set3_R1_MVT55	RPE_Set4_R1_MVT55	RPE_Set1_R3_MVT55	RPE_Set2_R3_MVT55	RPE_Set3_R3_MVT55	RPE_Set4_R3_MVT55	RPE_Set1_R5_MVT55	RPE_Set2_R5_MVT55	RPE_Set3_R5_MVT55	RPE_Set4_R5_MVT55
5	6	4	5	2	4	5	4	3	4	6	5	7	7	7	7	7	8	9	9	5	5	6	6
7	6	7	8	6	6.5	7.5	8	6	7	8	8	6	7	8	8	7	7.5	7.5	8	8	8	8.5	9
6	6.5	6.5	7	7	6.5	5	6.5	6.5	6.5	7	7	7	7	7	7.5	7.5	7	7	7.5	7	8.5	7.5	9
7.5	7	7	7.5	7.5	8	8	8.5	6	6.5	6.5	7	8.5	8.5	8.5	9	7	7.5	7.5	7.5	8	8	8	8
7	8	8.5	8	8	8	8	8	7	8	8	7.5	8	8.5	8.5	9	7.5	9	9	9.5	8	8.5	8.5	8.5
8	8	8	8.5	6	7	6	7	8	8	8	8	7	7.5	8	8.5	8	8	8.5	8.5	9	9	9.5	9.5
6	5	4	5	5	3	3	5	4	6	2	2	9	8	9	9.5	8	8.5	9	8.5	7	8	7.5	9
7.5	7.5	7.5	8	8.5	9	9.5	9.5	7.5	7	7.5	7.5	9.5	9	9	8.5	9	9.5	9.5	9.5	8	9	9	9
4	4	5	4	5.5	6	6	6.5	6	5.5	6.5	5.5	6.5	7.5	8	7.5	5.5	6.5	7.5	7	6.5	7	6.5	7
5	5.5	5.5	6	5	6	6.5	6.5	6	5.5	6	6.5	5	6	6	6	6.5	7	7	7.5	6	6.5	6.5	6
7.5	7.5	7.5	7.5	8	8	8	8	7.5	8	7.5	8	8	8	8.5	8.5	8	8.5	8	8	9	9.5	9	9
7.5	8	8.5	9	7.5	8.5	8	8	7	6	7	8	9	9	9.5	9	8.5	8.5	8.5	9	8	8.5	8	8.5
7.5	7	8.5	8	5	6	8.5	9	7	7.5	7.5	6.5	8	8.5	6	7.5	9	8	7.5	8	8.5	7	7.5	6.5
7	7	7.5	7.5	6.5	7	7	7	6	6.5	6.5	7	5	6	6.5	6.5	7.5	8	7.5	8	7.5	7.5	7	7
8	8	8	7.5	6.5	7.5	7	7	6.5	6.5	7.5	7.5	7	7.5	8	8	8.5	8	8	8.5	7	7	7.5	7
5	6	6	6	5	7	8	8	6	5	7	6	8	8	8	9	8	9	9	8	7	7	8	8
4	3	4	2	3	4	5	1	5	4	3	7	5	6	4	3	7.5	7	6.5	5	6	5	4	3
5	5	5	6	5	3	3	3	5	6	6	5	7	6	7	7	6	7	7	6	7.5	8.5	7	8
6	6	6.5	6.5	7	7	6.5	6.5	7.5	7	7.5	7	8	9	8.5	8	7.5	8	9	8.5	6	6	6	6
5	6	7	8	5	4	5	4	5	4	5	4	8	8.5	8.5	9	5	6	6	5	5	6	7	4
6	6	7	7	6	6	6.5	5	5	6	7	7.5	6	7	6	7	7	7.5	8	8	6	7	6	6
8	8	8	8	6	2	5	6	6	6	6	6	6	6	6	6	6	7	7	7	7	7.5	7.5	7
6	6	6	6	5	5	5	6	3	6	6	6	6.5	6.5	7	6.5	6	6	5	6	6.5	6.5	6.5	7

## Sheet: Pull_Figure 2
	Other	RPE
Rep_Set1_R1_MVT55	10.1739	7.17391
Rep_Set2_R1_MVT55	6.65217	7.47826
Rep_Set3_R1_MVT55	5.95652	7.5
Rep_Set4_R1_MVT55	5.65217	7.63043
Rep_Set1_R3_MVT55	10.0435	7.28261
Rep_Set2_R3_MVT55	9.6087	7.69565
Rep_Set3_R3_MVT55	8.6087	7.76087
Rep_Set4_R3_MVT55	8.17391	7.71739
Rep_Set1_R5_MVT55	10.8696	7.1087
Rep_Set2_R5_MVT55	10.6957	7.41304
Rep_Set3_R5_MVT55	9.86957	7.32609
Rep_Set4_R5_MVT55	9.65217	7.30435
Rep_Set1_R1_MVT65	7.6087	6.32609
Rep_Set2_R1_MVT65	5.91304	6.3913
Rep_Set3_R1_MVT65	5.6087	6.63043
Rep_Set4_R1_MVT65	5.08696	6.78261
Rep_Set1_R3_MVT65	6.73913	5.91304
Rep_Set2_R3_MVT65	6.26087	6.04348
Rep_Set3_R3_MVT65	6.17391	6.3913
Rep_Set4_R3_MVT65	6.21739	6.43478
Rep_Set1_R5_MVT65	7.21739	5.93478
Rep_Set2_R5_MVT65	7.26087	6.19565
Rep_Set3_R5_MVT65	6.95652	6.47826
Rep_Set4_R5_MVT65	6.82609	6.5
MVfast_Set1_R1_MVT55	0.758696	7.17391
MVfast_Set2_R1_MVT55	0.722174	7.47826
MVfast_Set3_R1_MVT55	0.704783	7.5
MVfast_Set4_R1_MVT55	0.709565	7.63043
MVfast_Set1_R3_MVT55	0.758696	7.28261
MVfast_Set2_R3_MVT55	0.769565	7.69565
MVfast_Set3_R3_MVT55	0.766087	7.76087
MVfast_Set4_R3_MVT55	0.752609	7.71739
MVfast_Set1_R5_MVT55	0.750435	7.1087
MVfast_Set2_R5_MVT55	0.775217	7.41304
MVfast_Set3_R5_MVT55	0.773043	7.32609
MVfast_Set4_R5_MVT55	0.764348	7.30435
MVfast_Set1_R1_MVT65	0.77913	6.32609
MVfast_Set2_R1_MVT65	0.758261	6.3913
MVfast_Set3_R1_MVT65	0.754348	6.63043
MVfast_Set4_R1_MVT65	0.75087	6.78261
MVfast_Set1_R3_MVT65	0.76	5.91304
MVfast_Set2_R3_MVT65	0.762609	6.04348
MVfast_Set3_R3_MVT65	0.763913	6.3913
MVfast_Set4_R3_MVT65	0.76087	6.43478
MVfast_Set1_R5_MVT65	0.765217	5.93478
MVfast_Set2_R5_MVT65	0.76913	6.19565
MVfast_Set3_R5_MVT65	0.772174	6.47826
MVfast_Set4_R5_MVT65	0.773043	6.5
MVDset_Set1_R1_MVT55	29.2217	7.17391
MVDset_Set2_R1_MVT55	25.5701	7.47826
MVDset_Set3_R1_MVT55	24.0106	7.5
MVDset_Set4_R1_MVT55	20.6045	7.63043
MVDset_Set1_R3_MVT55	29.8412	7.28261
MVDset_Set2_R3_MVT55	29.1407	7.69565
MVDset_Set3_R3_MVT55	29.3219	7.76087
MVDset_Set4_R3_MVT55	27.3142	7.71739
MVDset_Set1_R5_MVT55	29.0902	7.1087
MVDset_Set2_R5_MVT55	30.8605	7.41304
MVDset_Set3_R5_MVT55	30.2363	7.32609
MVDset_Set4_R5_MVT55	30.4616	7.30435
MVDset_Set1_R1_MVT65	18.507	6.32609
MVDset_Set2_R1_MVT65	17.7413	6.3913
MVDset_Set3_R1_MVT65	18.2203	6.63043
MVDset_Set4_R1_MVT65	15.9139	6.78261
MVDset_Set1_R3_MVT65	17.3392	5.91304
MVDset_Set2_R3_MVT65	17.977	6.04348
MVDset_Set3_R3_MVT65	18.7689	6.3913
MVDset_Set4_R3_MVT65	18.2193	6.43478
MVDset_Set1_R5_MVT65	18.633	5.93478
MVDset_Set2_R5_MVT65	18.1377	6.19565
MVDset_Set3_R5_MVT65	18.7883	6.47826
MVDset_Set4_R5_MVT65	19.8437	6.5
